# Supplementary material
Source: Springer Nature journal article supplement (https://www.springermedizin.de/resource/supplementary/12879_2007_661_MOESM2_ESM.pdf/9449454)

■ Incidence density nFUO ■ Incidence density HAI

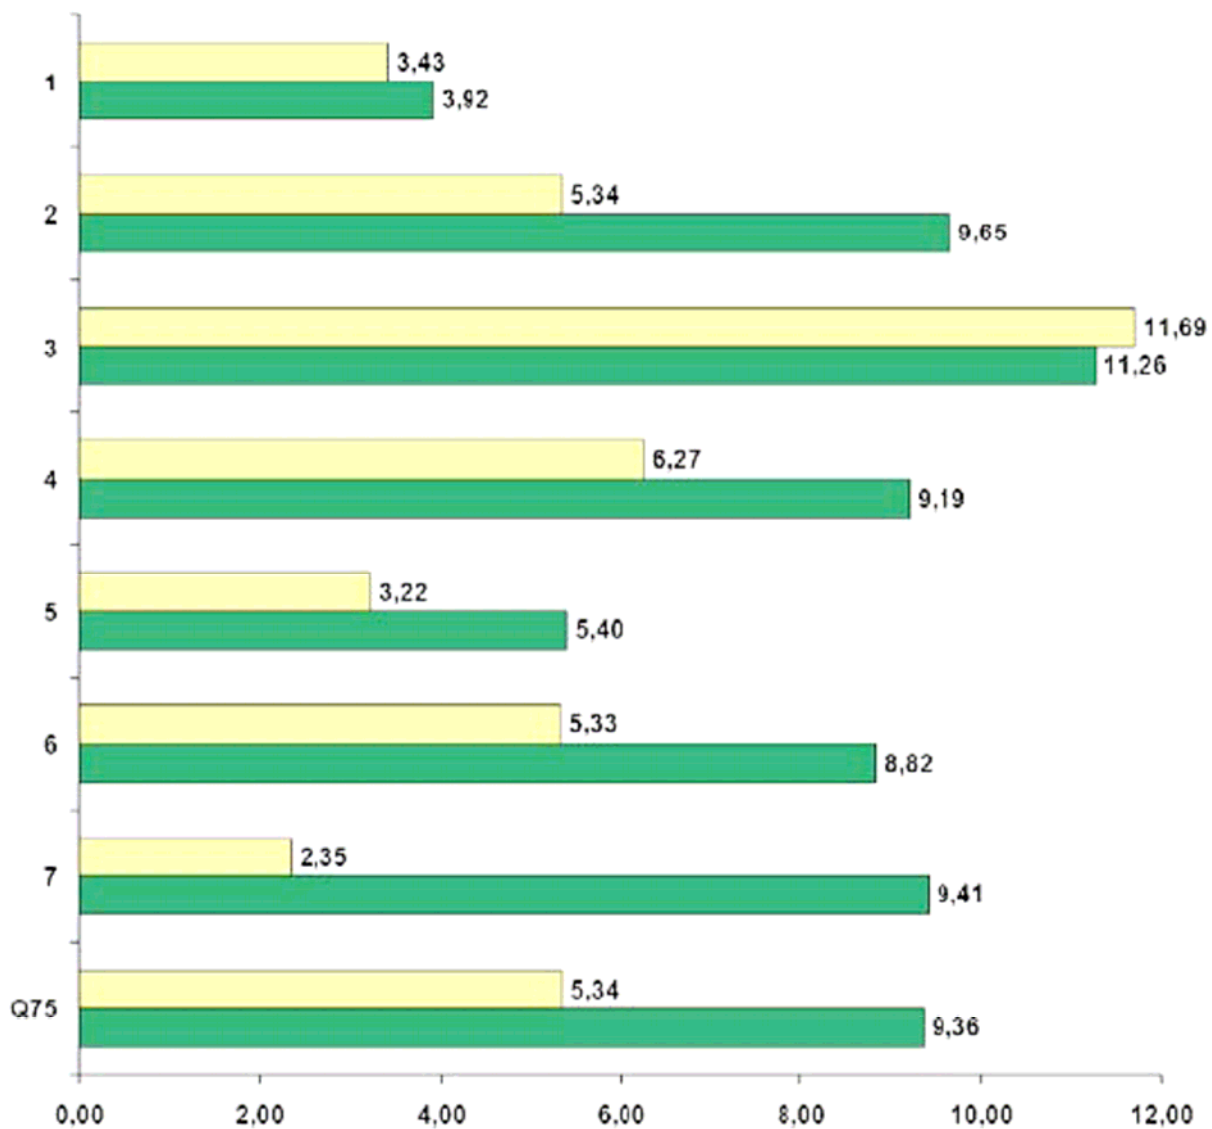

Supplement: MOESM2 [file 9449454]
